# Supplementary material
Source: publisher figshare collection journal article supplement (https://acs.figshare.com/ndownloader/files/4321873)
Supplement: Supplementary file 1 [file 4321873]

 
data_6ba
 
_audit_creation_method            SHELXL-97 
_chemical_name_systematic 
; 
 ? 
; 
_chemical_name_common             ? 
_chemical_melting_point           ? 
_chemical_formula_moiety          ? 
_chemical_formula_sum 
 'C12 H24 B10 O' 
_chemical_formula_weight          292.41 
 
loop_ 
 _atom_type_symbol 
 _atom_type_description 
 _atom_type_scat_dispersion_real 
 _atom_type_scat_dispersion_imag 
 _atom_type_scat_source 
 'C'  'C'   0.0033   0.0016 
 'International Tables Vol C Tables 4.2.6.8 and 6.1.1.4' 
 'H'  'H'   0.0000   0.0000 
 'International Tables Vol C Tables 4.2.6.8 and 6.1.1.4' 
 'B'  'B'   0.0013   0.0007 
 'International Tables Vol C Tables 4.2.6.8 and 6.1.1.4' 
 'O'  'O'   0.0106   0.0060 
 'International Tables Vol C Tables 4.2.6.8 and 6.1.1.4' 
 
_symmetry_cell_setting            orthorhombic 
_symmetry_space_group_name_H-M    P2(1)2(1)2(1) 
 
loop_ 
 _symmetry_equiv_pos_as_xyz 
 'x, y, z' 
 '-x+1/2, -y, z+1/2' 
 '-x, y+1/2, -z+1/2' 
 'x+1/2, -y+1/2, -z' 
 
_cell_length_a                    7.5821(7) 
_cell_length_b                    10.1241(9) 
_cell_length_c                    23.702(2) 
_cell_angle_alpha                 90.00 
_cell_angle_beta                  90.00 
_cell_angle_gamma                 90.00 
_cell_volume                      1819.4(3) 
_cell_formula_units_Z             4 
_cell_measurement_temperature     296(2) 
_cell_measurement_reflns_used     157 
_cell_measurement_theta_min       15 
_cell_measurement_theta_max       15 
 
_exptl_crystal_description        block 
_exptl_crystal_colour             colourless 
_exptl_crystal_size_max           0.50 
_exptl_crystal_size_mid           0.40 
_exptl_crystal_size_min           0.30 
_exptl_crystal_density_meas       ? 
_exptl_crystal_density_diffrn     1.068 
_exptl_crystal_density_method     'not measured' 
_exptl_crystal_F_000              616 
_exptl_absorpt_coefficient_mu     0.055 
_exptl_absorpt_correction_type    multi-scan 
_exptl_absorpt_correction_T_min   0.6162 
_exptl_absorpt_correction_T_max   0.7456
_exptl_absorpt_process_details    ? 
 
_exptl_special_details 
; 
 ? 
; 
 
_diffrn_ambient_temperature       296(2) 
_diffrn_radiation_wavelength      0.71073 
_diffrn_radiation_type            MoK\a 
_diffrn_radiation_source          'fine-focus sealed tube' 
_diffrn_radiation_monochromator   graphite 
_diffrn_measurement_device_type   'BRUKER KAPPA APEXII DUO DIFFRACTOMETER' 
_diffrn_measurement_method        'PHI & OMEGA SCAN' 
_diffrn_detector_area_resol_mean  ? 
_diffrn_reflns_number             16247 
_diffrn_reflns_av_R_equivalents   0.0582 
_diffrn_reflns_av_sigmaI/netI     0.0403 
_diffrn_reflns_limit_h_min        -6 
_diffrn_reflns_limit_h_max        9 
_diffrn_reflns_limit_k_min        -12 
_diffrn_reflns_limit_k_max        12 
_diffrn_reflns_limit_l_min        -27 
_diffrn_reflns_limit_l_max        28 
_diffrn_reflns_theta_min          1.72 
_diffrn_reflns_theta_max          25.25 
_reflns_number_total              3284 
_reflns_number_gt                 2435 
_reflns_threshold_expression      >2sigma(I) 
 
_computing_data_collection        'BRUKER KAPPA APEXII DUO DIFFRACTOMETER'  
_computing_cell_refinement        'BRUKER KAPPA APEXII DUO DIFFRACTOMETER' 
_computing_data_reduction         'BRUKER KAPPA APEXII DUO DIFFRACTOMETER'  
_computing_structure_solution     'SHELXS-97 (Sheldrick, 2008)' 
_computing_structure_refinement   'SHELXL-97 (Sheldrick, 2008)' 
_computing_molecular_graphics     'SIEMENS SHELXTL' 
_computing_publication_material   'SIEMENS SHELXTL' 
 
_refine_special_details 
; 
 Refinement of F^2^ against ALL reflections.  The weighted R-factor wR and 
 goodness of fit S are based on F^2^, conventional R-factors R are based 
 on F, with F set to zero for negative F^2^. The threshold expression of 
 F^2^ > 2sigma(F^2^) is used only for calculating R-factors(gt) etc. and is 
 not relevant to the choice of reflections for refinement.  R-factors based 
 on F^2^ are statistically about twice as large as those based on F, and R- 
 factors based on ALL data will be even larger. 
; 
 
_refine_ls_structure_factor_coef  Fsqd  
_refine_ls_matrix_type            full 
_refine_ls_weighting_scheme       calc  
_refine_ls_weighting_details 
 'calc w=1/[\s^2^(Fo^2^)+(0.0794P)^2^+0.1396P] where P=(Fo^2^+2Fc^2^)/3' 
_atom_sites_solution_primary      direct 
_atom_sites_solution_secondary    difmap 
_atom_sites_solution_hydrogens    geom 
_refine_ls_hydrogen_treatment     riding 
_refine_ls_extinction_method      none 
_refine_ls_extinction_coef        ? 
_refine_ls_abs_structure_details 
 'Flack H D (1983), Acta Cryst. A39, 876-881' 
_refine_ls_abs_structure_Flack    -1(2) 
_refine_ls_number_reflns          3284 
_refine_ls_number_parameters      208 
_refine_ls_number_restraints      0 
_refine_ls_R_factor_all           0.0769 
_refine_ls_R_factor_gt            0.0527 
_refine_ls_wR_factor_ref          0.1507 
_refine_ls_wR_factor_gt           0.1332 
_refine_ls_goodness_of_fit_ref    1.057 
_refine_ls_restrained_S_all       1.057 
_refine_ls_shift/su_max           0.006 
_refine_ls_shift/su_mean          0.001 
 
loop_ 
 _atom_site_label 
 _atom_site_type_symbol 
 _atom_site_fract_x 
 _atom_site_fract_y 
 _atom_site_fract_z 
 _atom_site_U_iso_or_equiv 
 _atom_site_adp_type 
 _atom_site_occupancy 
 _atom_site_symmetry_multiplicity 
 _atom_site_calc_flag 
 _atom_site_refinement_flags 
 _atom_site_disorder_assembly 
 _atom_site_disorder_group 
O1 O 0.8234(2) 0.56753(19) 0.13475(8) 0.0781(5) Uani 1 1 d . . . 
B3 B 0.4994(4) 0.3794(3) 0.11557(10) 0.0559(6) Uani 1 1 d . . . 
B4 B 0.6139(5) 0.2362(3) 0.09082(13) 0.0730(8) Uani 1 1 d . . . 
H4 H 0.6410 0.2237 0.0455 0.088 Uiso 1 1 calc R . . 
B5 B 0.7668(5) 0.1839(3) 0.14320(16) 0.0855(10) Uani 1 1 d . . . 
H5 H 0.8931 0.1375 0.1318 0.103 Uiso 1 1 calc R . . 
B6 B 0.7488(5) 0.2917(3) 0.20145(14) 0.0828(9) Uani 1 1 d . . . 
H6 H 0.8628 0.3170 0.2281 0.099 Uiso 1 1 calc R . . 
B7 B 0.3820(4) 0.3291(3) 0.17725(12) 0.0671(7) Uani 1 1 d . . . 
H7 H 0.2575 0.3777 0.1888 0.081 Uiso 1 1 calc R . . 
B8 B 0.3987(5) 0.2201(3) 0.11884(13) 0.0731(8) Uani 1 1 d . . . 
H8 H 0.2847 0.1958 0.0921 0.088 Uiso 1 1 calc R . . 
B9 B 0.5644(6) 0.1011(3) 0.13567(17) 0.0931(11) Uani 1 1 d . . . 
H9 H 0.5582 -0.0008 0.1196 0.112 Uiso 1 1 calc R . . 
B10 B 0.6462(6) 0.1374(4) 0.20423(17) 0.0963(11) Uani 1 1 d . . . 
H10 H 0.6930 0.0598 0.2330 0.116 Uiso 1 1 calc R . . 
B11 B 0.5331(5) 0.2775(4) 0.22942(14) 0.0839(9) Uani 1 1 d . . . 
H11 H 0.5061 0.2933 0.2745 0.101 Uiso 1 1 calc R . . 
B12 B 0.4194(5) 0.1582(3) 0.18911(14) 0.0864(10) Uani 1 1 d . . . 
H12 H 0.3184 0.0936 0.2078 0.104 Uiso 1 1 calc R . . 
C1 C 0.7196(3) 0.3465(2) 0.13293(10) 0.0613(6) Uani 1 1 d . . . 
C2 C 0.5841(3) 0.3987(2) 0.18259(9) 0.0607(6) Uani 1 1 d . . . 
H2 H 0.5936 0.5007 0.1983 0.073 Uiso 1 1 calc R . . 
C11 C 0.4431(3) 0.4995(2) 0.07862(9) 0.0562(6) Uani 1 1 d . . . 
C12 C 0.4002(5) 0.4804(3) 0.02256(10) 0.0852(8) Uani 1 1 d . . . 
H12A H 0.4126 0.3963 0.0072 0.102 Uiso 1 1 calc R . . 
C13 C 0.3404(5) 0.5800(4) -0.01127(14) 0.1061(11) Uani 1 1 d . . . 
H13A H 0.3119 0.5625 -0.0487 0.127 Uiso 1 1 calc R . . 
C14 C 0.3225(4) 0.7021(4) 0.00904(16) 0.0973(10) Uani 1 1 d . . . 
H14A H 0.2830 0.7697 -0.0143 0.117 Uiso 1 1 calc R . . 
C15 C 0.3624(4) 0.7277(3) 0.06406(15) 0.0892(9) Uani 1 1 d . . . 
H15A H 0.3480 0.8126 0.0784 0.107 Uiso 1 1 calc R . . 
C16 C 0.4247(4) 0.6268(3) 0.09893(11) 0.0701(7) Uani 1 1 d . . . 
H16A H 0.4542 0.6454 0.1362 0.084 Uiso 1 1 calc R . . 
C17 C 0.8655(3) 0.4421(3) 0.11295(12) 0.0751(7) Uani 1 1 d . . . 
H17A H 0.9755 0.4141 0.1311 0.090 Uiso 1 1 calc R . . 
C18 C 0.8973(5) 0.4408(4) 0.05111(14) 0.1101(12) Uani 1 1 d . . . 
H18A H 0.9898 0.5020 0.0421 0.165 Uiso 1 1 calc R . . 
H18B H 0.7913 0.4661 0.0318 0.165 Uiso 1 1 calc R . . 
H18C H 0.9312 0.3536 0.0395 0.165 Uiso 1 1 calc R . . 
C19 C 0.9626(5) 0.6526(4) 0.1445(2) 0.1174(13) Uani 1 1 d . . . 
H19A H 1.0248 0.6677 0.1093 0.141 Uiso 1 1 calc R . . 
H19B H 1.0443 0.6115 0.1706 0.141 Uiso 1 1 calc R . . 
C20 C 0.9060(5) 0.7789(3) 0.16741(15) 0.1076(11) Uani 1 1 d . . . 
H20A H 1.0069 0.8345 0.1731 0.161 Uiso 1 1 calc R . . 
H20B H 0.8473 0.7648 0.2028 0.161 Uiso 1 1 calc R . . 
H20C H 0.8263 0.8206 0.1415 0.161 Uiso 1 1 calc R . . 
 
loop_ 
 _atom_site_aniso_label 
 _atom_site_aniso_U_11 
 _atom_site_aniso_U_22 
 _atom_site_aniso_U_33 
 _atom_site_aniso_U_23 
 _atom_site_aniso_U_13 
 _atom_site_aniso_U_12 
O1 0.0513(9) 0.0806(11) 0.1024(13) -0.0118(10) -0.0034(9) -0.0057(9) 
B3 0.0564(15) 0.0633(15) 0.0480(13) -0.0073(12) -0.0032(11) 0.0014(12) 
B4 0.082(2) 0.0644(16) 0.0730(17) -0.0114(14) 0.0109(16) 0.0049(16) 
B5 0.084(2) 0.0699(19) 0.103(2) 0.0084(17) 0.0069(19) 0.0176(16) 
B6 0.077(2) 0.094(2) 0.0772(19) 0.0146(17) -0.0167(17) 0.0118(18) 
B7 0.0648(17) 0.0752(17) 0.0614(15) 0.0053(13) 0.0055(13) -0.0022(15) 
B8 0.077(2) 0.0663(16) 0.0761(19) -0.0076(14) 0.0021(16) -0.0121(16) 
B9 0.105(3) 0.0629(17) 0.112(3) -0.0002(18) 0.015(2) 0.0036(17) 
B10 0.101(3) 0.086(2) 0.102(3) 0.031(2) -0.003(2) 0.014(2) 
B11 0.096(2) 0.092(2) 0.0632(17) 0.0173(16) 0.0014(17) 0.0053(19) 
B12 0.097(3) 0.0733(19) 0.089(2) 0.0185(17) 0.014(2) -0.0023(19) 
C1 0.0556(14) 0.0658(13) 0.0624(13) 0.0013(11) 0.0019(11) 0.0095(11) 
C2 0.0657(15) 0.0708(14) 0.0457(11) 0.0008(10) -0.0024(11) 0.0058(12) 
C11 0.0484(13) 0.0655(13) 0.0547(12) 0.0008(11) -0.0035(10) -0.0051(11) 
C12 0.110(2) 0.0851(18) 0.0606(15) 0.0074(13) -0.0190(15) -0.0128(17) 
C13 0.128(3) 0.111(3) 0.0791(19) 0.0285(19) -0.0377(19) -0.024(2) 
C14 0.0754(19) 0.108(3) 0.108(3) 0.047(2) -0.0224(18) -0.0166(18) 
C15 0.0648(17) 0.0692(16) 0.134(3) 0.0130(17) 0.0002(18) 0.0007(14) 
C16 0.0597(15) 0.0738(17) 0.0768(15) -0.0005(13) -0.0064(12) 0.0048(13) 
C17 0.0550(15) 0.0774(16) 0.0928(19) -0.0033(14) 0.0011(13) 0.0101(14) 
C18 0.113(3) 0.096(2) 0.122(3) -0.0042(19) 0.058(2) -0.013(2) 
C19 0.071(2) 0.103(2) 0.178(4) -0.012(3) -0.009(2) -0.0185(19) 
C20 0.122(3) 0.097(2) 0.104(2) -0.0107(18) -0.005(2) -0.023(2) 
 
_geom_special_details 
; 
 All esds (except the esd in the dihedral angle between two l.s. planes) 
 are estimated using the full covariance matrix.  The cell esds are taken 
 into account individually in the estimation of esds in distances, angles 
 and torsion angles; correlations between esds in cell parameters are only 
 used when they are defined by crystal symmetry.  An approximate (isotropic) 
 treatment of cell esds is used for estimating esds involving l.s. planes. 
; 
 
loop_ 
 _geom_bond_atom_site_label_1 
 _geom_bond_atom_site_label_2 
 _geom_bond_distance 
 _geom_bond_site_symmetry_2 
 _geom_bond_publ_flag 
O1 C19 1.382(4) . ? 
O1 C17 1.408(3) . ? 
B3 C11 1.557(3) . ? 
B3 C2 1.724(3) . ? 
B3 C1 1.751(3) . ? 
B3 B7 1.786(4) . ? 
B3 B8 1.786(4) . ? 
B3 B4 1.789(4) . ? 
B4 C1 1.699(4) . ? 
B4 B8 1.769(5) . ? 
B4 B9 1.773(5) . ? 
B4 B5 1.779(5) . ? 
B5 C1 1.703(4) . ? 
B5 B9 1.758(6) . ? 
B5 B6 1.765(5) . ? 
B5 B10 1.774(5) . ? 
B6 C2 1.713(4) . ? 
B6 C1 1.731(4) . ? 
B6 B10 1.746(5) . ? 
B6 B11 1.770(5) . ? 
B7 C2 1.691(4) . ? 
B7 B11 1.765(5) . ? 
B7 B8 1.775(4) . ? 
B7 B12 1.776(4) . ? 
B8 B9 1.786(5) . ? 
B8 B12 1.786(5) . ? 
B9 B12 1.774(5) . ? 
B9 B10 1.778(6) . ? 
B10 B11 1.762(5) . ? 
B10 B12 1.769(6) . ? 
B11 C2 1.699(4) . ? 
B11 B12 1.765(5) . ? 
C1 C17 1.544(4) . ? 
C1 C2 1.649(3) . ? 
C11 C12 1.382(3) . ? 
C11 C16 1.383(3) . ? 
C12 C13 1.366(4) . ? 
C13 C14 1.334(5) . ? 
C14 C15 1.363(5) . ? 
C15 C16 1.397(4) . ? 
C17 C18 1.485(4) . ? 
C19 C20 1.454(5) . ? 
 
loop_ 
 _geom_angle_atom_site_label_1 
 _geom_angle_atom_site_label_2 
 _geom_angle_atom_site_label_3 
 _geom_angle 
 _geom_angle_site_symmetry_1 
 _geom_angle_site_symmetry_3 
 _geom_angle_publ_flag 
C19 O1 C17 116.7(2) . . ? 
C11 B3 C2 122.1(2) . . ? 
C11 B3 C1 122.8(2) . . ? 
C2 B3 C1 56.64(14) . . ? 
C11 B3 B7 123.1(2) . . ? 
C2 B3 B7 57.57(15) . . ? 
C1 B3 B7 103.20(19) . . ? 
C11 B3 B8 127.7(2) . . ? 
C2 B3 B8 102.79(18) . . ? 
C1 B3 B8 103.03(19) . . ? 
B7 B3 B8 59.59(16) . . ? 
C11 B3 B4 125.5(2) . . ? 
C2 B3 B4 102.31(19) . . ? 
C1 B3 B4 57.34(16) . . ? 
B7 B3 B4 106.2(2) . . ? 
B8 B3 B4 59.31(18) . . ? 
C1 B4 B8 106.0(2) . . ? 
C1 B4 B9 104.8(2) . . ? 
B8 B4 B9 60.6(2) . . ? 
C1 B4 B5 58.57(17) . . ? 
B8 B4 B5 108.1(2) . . ? 
B9 B4 B5 59.3(2) . . ? 
C1 B4 B3 60.23(14) . . ? 
B8 B4 B3 60.27(17) . . ? 
B9 B4 B3 109.0(2) . . ? 
B5 B4 B3 109.2(2) . . ? 
C1 B5 B9 105.3(3) . . ? 
C1 B5 B6 59.85(16) . . ? 
B9 B5 B6 107.9(3) . . ? 
C1 B5 B10 105.3(2) . . ? 
B9 B5 B10 60.4(2) . . ? 
B6 B5 B10 59.1(2) . . ? 
C1 B5 B4 58.35(16) . . ? 
B9 B5 B4 60.2(2) . . ? 
B6 B5 B4 108.1(2) . . ? 
B10 B5 B4 108.2(3) . . ? 
C2 B6 C1 57.22(14) . . ? 
C2 B6 B10 104.5(2) . . ? 
C1 B6 B10 105.4(2) . . ? 
C2 B6 B5 104.1(2) . . ? 
C1 B6 B5 58.29(17) . . ? 
B10 B6 B5 60.7(2) . . ? 
C2 B6 B11 58.35(17) . . ? 
C1 B6 B11 105.0(2) . . ? 
B10 B6 B11 60.1(2) . . ? 
B5 B6 B11 108.3(3) . . ? 
C2 B7 B11 58.85(17) . . ? 
C2 B7 B8 104.6(2) . . ? 
B11 B7 B8 108.4(2) . . ? 
C2 B7 B12 104.5(2) . . ? 
B11 B7 B12 59.8(2) . . ? 
B8 B7 B12 60.42(18) . . ? 
C2 B7 B3 59.39(15) . . ? 
B11 B7 B3 109.5(2) . . ? 
B8 B7 B3 60.21(16) . . ? 
B12 B7 B3 109.2(2) . . ? 
B4 B8 B7 107.5(2) . . ? 
B4 B8 B9 59.84(19) . . ? 
B7 B8 B9 107.2(2) . . ? 
B4 B8 B3 60.42(16) . . ? 
B7 B8 B3 60.20(15) . . ? 
B9 B8 B3 108.6(2) . . ? 
B4 B8 B12 107.6(2) . . ? 
B7 B8 B12 59.82(18) . . ? 
B9 B8 B12 59.6(2) . . ? 
B3 B8 B12 108.7(2) . . ? 
B5 B9 B4 60.52(19) . . ? 
B5 B9 B12 108.2(3) . . ? 
B4 B9 B12 107.9(2) . . ? 
B5 B9 B10 60.2(2) . . ? 
B4 B9 B10 108.3(3) . . ? 
B12 B9 B10 59.8(2) . . ? 
B5 B9 B8 108.3(2) . . ? 
B4 B9 B8 59.60(19) . . ? 
B12 B9 B8 60.24(19) . . ? 
B10 B9 B8 108.0(2) . . ? 
B6 B10 B11 60.6(2) . . ? 
B6 B10 B12 108.6(2) . . ? 
B11 B10 B12 60.0(2) . . ? 
B6 B10 B5 60.2(2) . . ? 
B11 B10 B5 108.3(2) . . ? 
B12 B10 B5 107.7(3) . . ? 
B6 B10 B9 107.8(2) . . ? 
B11 B10 B9 107.9(3) . . ? 
B12 B10 B9 60.0(2) . . ? 
B5 B10 B9 59.3(2) . . ? 
C2 B11 B10 104.4(2) . . ? 
C2 B11 B7 58.41(16) . . ? 
B10 B11 B7 108.5(2) . . ? 
C2 B11 B12 104.6(2) . . ? 
B10 B11 B12 60.2(2) . . ? 
B7 B11 B12 60.41(19) . . ? 
C2 B11 B6 59.14(18) . . ? 
B10 B11 B6 59.2(2) . . ? 
B7 B11 B6 108.3(2) . . ? 
B12 B11 B6 107.7(3) . . ? 
B11 B12 B10 59.8(2) . . ? 
B11 B12 B9 107.9(3) . . ? 
B10 B12 B9 60.2(2) . . ? 
B11 B12 B7 59.78(19) . . ? 
B10 B12 B7 107.6(3) . . ? 
B9 B12 B7 107.7(2) . . ? 
B11 B12 B8 107.9(2) . . ? 
B10 B12 B8 108.4(2) . . ? 
B9 B12 B8 60.2(2) . . ? 
B7 B12 B8 59.77(18) . . ? 
C17 C1 C2 117.7(2) . . ? 
C17 C1 B4 124.7(2) . . ? 
C2 C1 B4 109.63(19) . . ? 
C17 C1 B5 120.0(2) . . ? 
C2 C1 B5 109.8(2) . . ? 
B4 C1 B5 63.08(19) . . ? 
C17 C1 B6 113.4(2) . . ? 
C2 C1 B6 60.85(16) . . ? 
B4 C1 B6 113.6(2) . . ? 
B5 C1 B6 61.9(2) . . ? 
C17 C1 B3 119.46(19) . . ? 
C2 C1 B3 60.85(14) . . ? 
B4 C1 B3 62.43(17) . . ? 
B5 C1 B3 114.7(2) . . ? 
B6 C1 B3 113.8(2) . . ? 
C1 C2 B7 112.18(19) . . ? 
C1 C2 B11 112.1(2) . . ? 
B7 C2 B11 62.74(18) . . ? 
C1 C2 B6 61.92(16) . . ? 
B7 C2 B6 114.6(2) . . ? 
B11 C2 B6 62.51(19) . . ? 
C1 C2 B3 62.50(14) . . ? 
B7 C2 B3 63.04(16) . . ? 
B11 C2 B3 115.8(2) . . ? 
B6 C2 B3 116.12(19) . . ? 
C12 C11 C16 116.2(2) . . ? 
C12 C11 B3 119.7(2) . . ? 
C16 C11 B3 124.0(2) . . ? 
C13 C12 C11 122.7(3) . . ? 
C14 C13 C12 120.4(3) . . ? 
C13 C14 C15 120.0(3) . . ? 
C14 C15 C16 120.1(3) . . ? 
C11 C16 C15 120.7(3) . . ? 
O1 C17 C18 114.0(3) . . ? 
O1 C17 C1 106.8(2) . . ? 
C18 C17 C1 114.4(2) . . ? 
O1 C19 C20 112.6(3) . . ? 
 
_diffrn_measured_fraction_theta_max    0.999 
_diffrn_reflns_theta_full              25.25 
_diffrn_measured_fraction_theta_full   0.999 
_refine_diff_density_max    0.129 
_refine_diff_density_min   -0.155 
_refine_diff_density_rms    0.028 

#===END


data_6fa
 
_audit_creation_method            SHELXL-97 
_chemical_name_systematic 
; 
 ? 
; 
_chemical_name_common             ? 
_chemical_melting_point           ? 
_chemical_formula_moiety          ? 
_chemical_formula_sum 
 'C6 H19 B10 I O' 
_chemical_formula_weight          342.21 
 
loop_ 
 _atom_type_symbol 
 _atom_type_description 
 _atom_type_scat_dispersion_real 
 _atom_type_scat_dispersion_imag 
 _atom_type_scat_source 
 'C'  'C'   0.0033   0.0016 
 'International Tables Vol C Tables 4.2.6.8 and 6.1.1.4' 
 'H'  'H'   0.0000   0.0000 
 'International Tables Vol C Tables 4.2.6.8 and 6.1.1.4' 
 'B'  'B'   0.0013   0.0007 
 'International Tables Vol C Tables 4.2.6.8 and 6.1.1.4' 
 'O'  'O'   0.0106   0.0060 
 'International Tables Vol C Tables 4.2.6.8 and 6.1.1.4' 
 'I'  'I'  -0.4742   1.8119 
 'International Tables Vol C Tables 4.2.6.8 and 6.1.1.4' 
 
_symmetry_cell_setting            Orthorhombic 
_symmetry_space_group_name_H-M    P2(1)2(1)2(1) 
 
loop_ 
 _symmetry_equiv_pos_as_xyz 
 'x, y, z' 
 '-x+1/2, -y, z+1/2' 
 '-x, y+1/2, -z+1/2' 
 'x+1/2, -y+1/2, -z' 
 
_cell_length_a                    7.1977(4) 
_cell_length_b                    9.1857(5) 
_cell_length_c                    22.8755(12) 
_cell_angle_alpha                 90.00 
_cell_angle_beta                  90.00 
_cell_angle_gamma                 90.00 
_cell_volume                      1512.43(14) 
_cell_formula_units_Z             4 
_cell_measurement_temperature     296(2) 
_cell_measurement_reflns_used     341 
_cell_measurement_theta_min       15 
_cell_measurement_theta_max       15 
 
_exptl_crystal_description        block 
_exptl_crystal_colour             colourless 
_exptl_crystal_size_max           0.50 
_exptl_crystal_size_mid           0.40 
_exptl_crystal_size_min           0.30 
_exptl_crystal_density_meas       ? 
_exptl_crystal_density_diffrn     1.503 
_exptl_crystal_density_method     'not measured' 
_exptl_crystal_F_000              664 
_exptl_absorpt_coefficient_mu     2.092 
_exptl_absorpt_correction_type    multi-scan 
_exptl_absorpt_correction_T_min   0.5690  
_exptl_absorpt_correction_T_max   0.7456
_exptl_absorpt_process_details    ? 
 
_exptl_special_details 
; 
 ? 
; 
 
_diffrn_ambient_temperature       296(2) 
_diffrn_radiation_wavelength      0.71073 
_diffrn_radiation_type            MoK\a 
_diffrn_radiation_source          'fine-focus sealed tube' 
_diffrn_radiation_monochromator   graphite 
_diffrn_measurement_device_type   'BRUKER KAPPA APEXII DUO DIFFRACTOMETER' 
_diffrn_measurement_method        'PHI & OMEGA SCAN' 
_diffrn_detector_area_resol_mean  ? 
_diffrn_reflns_number             13425 
_diffrn_reflns_av_R_equivalents   0.0386 
_diffrn_reflns_av_sigmaI/netI     0.0221 
_diffrn_reflns_limit_h_min        -8 
_diffrn_reflns_limit_h_max        8 
_diffrn_reflns_limit_k_min        -11 
_diffrn_reflns_limit_k_max        11 
_diffrn_reflns_limit_l_min        -27 
_diffrn_reflns_limit_l_max        27 
_diffrn_reflns_theta_min          2.39 
_diffrn_reflns_theta_max          25.25 
_reflns_number_total              2732 
_reflns_number_gt                 2710 
_reflns_threshold_expression      >2sigma(I) 
 
_computing_data_collection        'BRUKER KAPPA APEXII DUO DIFFRACTOMETER'  
_computing_cell_refinement        'BRUKER KAPPA APEXII DUO DIFFRACTOMETER' 
_computing_data_reduction         'BRUKER KAPPA APEXII DUO DIFFRACTOMETER'  
_computing_structure_solution     'SHELXS-97 (Sheldrick, 2008)' 
_computing_structure_refinement   'SHELXL-97 (Sheldrick, 2008)' 
_computing_molecular_graphics     'SIEMENS SHELXTL' 
_computing_publication_material   'SIEMENS SHELXTL' 
 
_refine_special_details 
; 
 Refinement of F^2^ against ALL reflections.  The weighted R-factor wR and 
 goodness of fit S are based on F^2^, conventional R-factors R are based 
 on F, with F set to zero for negative F^2^. The threshold expression of 
 F^2^ > 2sigma(F^2^) is used only for calculating R-factors(gt) etc. and is 
 not relevant to the choice of reflections for refinement.  R-factors based 
 on F^2^ are statistically about twice as large as those based on F, and R- 
 factors based on ALL data will be even larger. 
; 
 
_refine_ls_structure_factor_coef  Fsqd  
_refine_ls_matrix_type            full 
_refine_ls_weighting_scheme       calc  
_refine_ls_weighting_details 
 'calc w=1/[\s^2^(Fo^2^)+(0.0140P)^2^+0.5133P] where P=(Fo^2^+2Fc^2^)/3' 
_atom_sites_solution_primary      direct 
_atom_sites_solution_secondary    difmap 
_atom_sites_solution_hydrogens    geom 
_refine_ls_hydrogen_treatment     riding 
_refine_ls_extinction_method      none 
_refine_ls_extinction_coef        ? 
_refine_ls_abs_structure_details 
 'Flack H D (1983), Acta Cryst. A39, 876-881' 
_refine_ls_abs_structure_Flack    0.54(2) 
_refine_ls_number_reflns          2732 
_refine_ls_number_parameters      164 
_refine_ls_number_restraints      0 
_refine_ls_R_factor_all           0.0173 
_refine_ls_R_factor_gt            0.0171 
_refine_ls_wR_factor_ref          0.0453 
_refine_ls_wR_factor_gt           0.0452 
_refine_ls_goodness_of_fit_ref    1.141 
_refine_ls_restrained_S_all       1.141 
_refine_ls_shift/su_max           0.001 
_refine_ls_shift/su_mean          0.000 
 
loop_ 
 _atom_site_label 
 _atom_site_type_symbol 
 _atom_site_fract_x 
 _atom_site_fract_y 
 _atom_site_fract_z 
 _atom_site_U_iso_or_equiv 
 _atom_site_adp_type 
 _atom_site_occupancy 
 _atom_site_symmetry_multiplicity 
 _atom_site_calc_flag 
 _atom_site_refinement_flags 
 _atom_site_disorder_assembly 
 _atom_site_disorder_group 
I1 I 0.44072(2) 0.01921(2) 0.212337(7) 0.05239(7) Uani 1 1 d . . . 
O1 O -0.1157(3) -0.5571(2) 0.10189(8) 0.0528(5) Uani 1 1 d . . . 
C1 C 0.0534(4) -0.3524(2) 0.13491(9) 0.0341(5) Uani 1 1 d . . . 
C2 C -0.0496(4) -0.2730(3) 0.07922(10) 0.0363(5) Uani 1 1 d . . . 
H2 H -0.1506 -0.3332 0.0524 0.044 Uiso 1 1 calc R . . 
C11 C -0.0061(4) -0.5100(3) 0.14928(10) 0.0426(5) Uani 1 1 d . . . 
H11A H -0.0851 -0.5072 0.1841 0.051 Uiso 1 1 calc R . . 
C12 C 0.1553(5) -0.6099(3) 0.16173(15) 0.0622(8) Uani 1 1 d . . . 
H12A H 0.1096 -0.7057 0.1705 0.093 Uiso 1 1 calc R . . 
H12B H 0.2242 -0.5734 0.1945 0.093 Uiso 1 1 calc R . . 
H12C H 0.2348 -0.6143 0.1281 0.093 Uiso 1 1 calc R . . 
C13 C -0.2464(5) -0.6682(4) 0.11549(16) 0.0691(9) Uani 1 1 d . . . 
H13A H -0.3277 -0.6353 0.1466 0.083 Uiso 1 1 calc R . . 
H13B H -0.1814 -0.7544 0.1290 0.083 Uiso 1 1 calc R . . 
C14 C -0.3573(7) -0.7043(4) 0.06360(19) 0.0912(14) Uani 1 1 d . . . 
H14A H -0.4474 -0.7774 0.0735 0.137 Uiso 1 1 calc R . . 
H14B H -0.2772 -0.7407 0.0334 0.137 Uiso 1 1 calc R . . 
H14C H -0.4200 -0.6186 0.0499 0.137 Uiso 1 1 calc R . . 
B3 B -0.1183(4) -0.2242(3) 0.14825(12) 0.0375(6) Uani 1 1 d . . . 
H3 H -0.2544 -0.2483 0.1678 0.045 Uiso 1 1 calc R . . 
B4 B 0.0911(4) -0.2297(3) 0.18906(11) 0.0383(6) Uani 1 1 d . . . 
H4 H 0.0912 -0.2568 0.2359 0.046 Uiso 1 1 calc R . . 
B5 B 0.2758(4) -0.2871(3) 0.14210(13) 0.0373(6) Uani 1 1 d . . . 
H5 H 0.3946 -0.3502 0.1587 0.045 Uiso 1 1 calc R . . 
B6 B 0.1795(4) -0.3209(3) 0.07236(12) 0.0385(6) Uani 1 1 d . . . 
H6 H 0.2325 -0.4074 0.0436 0.046 Uiso 1 1 calc R . . 
B7 B -0.0912(4) -0.0936(3) 0.09152(13) 0.0413(6) Uani 1 1 d . . . 
H7 H -0.2106 -0.0321 0.0745 0.050 Uiso 1 1 calc R . . 
B8 B 0.0030(4) -0.0618(3) 0.16190(12) 0.0380(6) Uani 1 1 d . . . 
H8 H -0.0537 0.0219 0.1913 0.046 Uiso 1 1 calc R . . 
B9 B 0.2445(4) -0.1002(3) 0.15769(11) 0.0344(6) Uani 1 1 d . . . 
B10 B 0.3016(4) -0.1566(3) 0.08546(12) 0.0396(6) Uani 1 1 d . . . 
H10 H 0.4372 -0.1342 0.0652 0.047 Uiso 1 1 calc R . . 
B11 B 0.0925(4) -0.1531(3) 0.04493(12) 0.0411(6) Uani 1 1 d . . . 
H11 H 0.0912 -0.1299 -0.0023 0.049 Uiso 1 1 calc R . . 
B12 B 0.1331(4) -0.0158(3) 0.09765(11) 0.0377(5) Uani 1 1 d . . . 
H12 H 0.1602 0.0979 0.0853 0.045 Uiso 1 1 calc R . . 
 
loop_ 
 _atom_site_aniso_label 
 _atom_site_aniso_U_11 
 _atom_site_aniso_U_22 
 _atom_site_aniso_U_33 
 _atom_site_aniso_U_23 
 _atom_site_aniso_U_13 
 _atom_site_aniso_U_12 
I1 0.04775(10) 0.05636(10) 0.05306(10) -0.01283(8) -0.01384(7) -0.00718(8) 
O1 0.0637(12) 0.0423(10) 0.0523(10) 0.0038(8) -0.0061(9) -0.0179(9) 
C1 0.0332(11) 0.0360(11) 0.0331(10) -0.0009(9) -0.0016(11) 0.0006(10) 
C2 0.0367(12) 0.0368(11) 0.0354(11) 0.0002(9) -0.0047(10) -0.0036(12) 
C11 0.0490(12) 0.0339(12) 0.0448(12) 0.0002(10) -0.0001(10) -0.0022(11) 
C12 0.071(2) 0.0382(15) 0.078(2) 0.0035(14) -0.0127(18) 0.0015(14) 
C13 0.073(2) 0.0513(17) 0.083(2) 0.0111(16) -0.0108(19) -0.0251(16) 
C14 0.101(3) 0.063(2) 0.110(3) 0.017(2) -0.037(3) -0.035(2) 
B3 0.0289(13) 0.0381(14) 0.0453(15) -0.0022(12) 0.0052(11) -0.0005(10) 
B4 0.0445(16) 0.0377(13) 0.0326(12) -0.0014(10) 0.0012(12) 0.0001(12) 
B5 0.0319(14) 0.0381(14) 0.0419(14) -0.0037(12) 0.0000(12) 0.0030(11) 
B6 0.0393(15) 0.0408(15) 0.0356(13) -0.0083(11) 0.0048(12) -0.0019(12) 
B7 0.0397(16) 0.0348(14) 0.0493(15) 0.0035(11) -0.0101(13) 0.0000(12) 
B8 0.0365(13) 0.0363(14) 0.0413(13) -0.0035(11) 0.0019(11) 0.0042(10) 
B9 0.0318(13) 0.0376(14) 0.0337(13) -0.0059(11) -0.0035(10) -0.0005(11) 
B10 0.0394(15) 0.0439(15) 0.0354(14) -0.0062(11) 0.0083(12) -0.0051(12) 
B11 0.0497(17) 0.0413(14) 0.0321(12) 0.0020(10) -0.0031(13) -0.0118(13) 
B12 0.0407(13) 0.0373(13) 0.0352(11) -0.0012(11) -0.0014(10) -0.0023(12) 
 
_geom_special_details 
; 
 All esds (except the esd in the dihedral angle between two l.s. planes) 
 are estimated using the full covariance matrix.  The cell esds are taken 
 into account individually in the estimation of esds in distances, angles 
 and torsion angles; correlations between esds in cell parameters are only 
 used when they are defined by crystal symmetry.  An approximate (isotropic) 
 treatment of cell esds is used for estimating esds involving l.s. planes. 
; 
 
loop_ 
 _geom_bond_atom_site_label_1 
 _geom_bond_atom_site_label_2 
 _geom_bond_distance 
 _geom_bond_site_symmetry_2 
 _geom_bond_publ_flag 
I1 B9 2.182(3) . ? 
O1 C11 1.409(3) . ? 
O1 C13 1.423(4) . ? 
C1 C11 1.545(3) . ? 
C1 C2 1.644(3) . ? 
C1 B4 1.696(3) . ? 
C1 B5 1.718(4) . ? 
C1 B6 1.719(4) . ? 
C1 B3 1.734(4) . ? 
C2 B11 1.696(4) . ? 
C2 B7 1.698(4) . ? 
C2 B6 1.714(4) . ? 
C2 B3 1.714(4) . ? 
C11 C12 1.507(4) . ? 
C13 C14 1.469(5) . ? 
B3 B8 1.756(4) . ? 
B3 B4 1.774(4) . ? 
B3 B7 1.778(4) . ? 
B4 B9 1.775(4) . ? 
B4 B8 1.780(4) . ? 
B4 B5 1.789(4) . ? 
B5 B6 1.767(4) . ? 
B5 B9 1.768(4) . ? 
B5 B10 1.775(4) . ? 
B6 B10 1.772(4) . ? 
B6 B11 1.779(4) . ? 
B7 B12 1.771(4) . ? 
B7 B8 1.771(4) . ? 
B7 B11 1.784(4) . ? 
B8 B9 1.777(4) . ? 
B8 B12 1.793(4) . ? 
B9 B12 1.769(4) . ? 
B9 B10 1.780(4) . ? 
B10 B11 1.768(4) . ? 
B10 B12 1.795(4) . ? 
B11 B12 1.769(4) . ? 
 
loop_ 
 _geom_angle_atom_site_label_1 
 _geom_angle_atom_site_label_2 
 _geom_angle_atom_site_label_3 
 _geom_angle 
 _geom_angle_site_symmetry_1 
 _geom_angle_site_symmetry_3 
 _geom_angle_publ_flag 
C11 O1 C13 115.0(2) . . ? 
C11 C1 C2 117.10(19) . . ? 
C11 C1 B4 120.75(19) . . ? 
C2 C1 B4 110.08(17) . . ? 
C11 C1 B5 124.4(2) . . ? 
C2 C1 B5 109.85(18) . . ? 
B4 C1 B5 63.18(16) . . ? 
C11 C1 B6 118.74(19) . . ? 
C2 C1 B6 61.22(15) . . ? 
B4 C1 B6 114.30(19) . . ? 
B5 C1 B6 61.89(16) . . ? 
C11 C1 B3 113.7(2) . . ? 
C2 C1 B3 60.92(15) . . ? 
B4 C1 B3 62.27(16) . . ? 
B5 C1 B3 114.23(19) . . ? 
B6 C1 B3 114.12(18) . . ? 
C1 C2 B11 112.0(2) . . ? 
C1 C2 B7 112.43(18) . . ? 
B11 C2 B7 63.43(17) . . ? 
C1 C2 B6 61.53(16) . . ? 
B11 C2 B6 62.88(17) . . ? 
B7 C2 B6 115.7(2) . . ? 
C1 C2 B3 62.11(14) . . ? 
B11 C2 B3 115.49(19) . . ? 
B7 C2 B3 62.81(16) . . ? 
B6 C2 B3 115.40(19) . . ? 
O1 C11 C12 113.0(2) . . ? 
O1 C11 C1 106.19(19) . . ? 
C12 C11 C1 113.4(2) . . ? 
O1 C13 C14 110.2(3) . . ? 
C2 B3 C1 56.97(14) . . ? 
C2 B3 B8 104.04(19) . . ? 
C1 B3 B8 104.72(19) . . ? 
C2 B3 B4 103.44(19) . . ? 
C1 B3 B4 57.84(15) . . ? 
B8 B3 B4 60.56(16) . . ? 
C2 B3 B7 58.15(15) . . ? 
C1 B3 B7 104.57(19) . . ? 
B8 B3 B7 60.15(16) . . ? 
B4 B3 B7 108.1(2) . . ? 
C1 B4 B3 59.89(16) . . ? 
C1 B4 B9 104.46(18) . . ? 
B3 B4 B9 107.25(19) . . ? 
C1 B4 B8 105.27(19) . . ? 
B3 B4 B8 59.23(16) . . ? 
B9 B4 B8 59.98(15) . . ? 
C1 B4 B5 58.99(15) . . ? 
B3 B4 B5 108.89(19) . . ? 
B9 B4 B5 59.50(15) . . ? 
B8 B4 B5 108.10(19) . . ? 
C1 B5 B6 59.09(15) . . ? 
C1 B5 B9 103.86(18) . . ? 
B6 B5 B9 107.6(2) . . ? 
C1 B5 B10 105.27(19) . . ? 
B6 B5 B10 60.06(16) . . ? 
B9 B5 B10 60.30(16) . . ? 
C1 B5 B4 57.83(14) . . ? 
B6 B5 B4 107.60(19) . . ? 
B9 B5 B4 59.87(15) . . ? 
B10 B5 B4 108.5(2) . . ? 
C2 B6 C1 57.24(14) . . ? 
C2 B6 B5 104.46(18) . . ? 
C1 B6 B5 59.02(15) . . ? 
C2 B6 B10 104.1(2) . . ? 
C1 B6 B10 105.33(18) . . ? 
B5 B6 B10 60.19(16) . . ? 
C2 B6 B11 58.06(16) . . ? 
C1 B6 B11 104.69(19) . . ? 
B5 B6 B11 107.71(19) . . ? 
B10 B6 B11 59.72(17) . . ? 
C2 B7 B12 104.1(2) . . ? 
C2 B7 B8 104.08(19) . . ? 
B12 B7 B8 60.83(15) . . ? 
C2 B7 B3 59.04(15) . . ? 
B12 B7 B3 108.32(19) . . ? 
B8 B7 B3 59.32(15) . . ? 
C2 B7 B11 58.23(15) . . ? 
B12 B7 B11 59.68(16) . . ? 
B8 B7 B11 108.1(2) . . ? 
B3 B7 B11 108.11(19) . . ? 
B3 B8 B7 60.53(16) . . ? 
B3 B8 B9 107.95(19) . . ? 
B7 B8 B9 107.01(19) . . ? 
B3 B8 B4 60.21(16) . . ? 
B7 B8 B4 108.11(19) . . ? 
B9 B8 B4 59.88(16) . . ? 
B3 B8 B12 108.29(19) . . ? 
B7 B8 B12 59.58(16) . . ? 
B9 B8 B12 59.42(15) . . ? 
B4 B8 B12 107.70(19) . . ? 
B5 B9 B12 109.05(19) . . ? 
B5 B9 B4 60.63(15) . . ? 
B12 B9 B4 108.99(19) . . ? 
B5 B9 B8 109.15(19) . . ? 
B12 B9 B8 60.75(15) . . ? 
B4 B9 B8 60.15(16) . . ? 
B5 B9 B10 60.03(16) . . ? 
B12 B9 B10 60.76(15) . . ? 
B4 B9 B10 108.89(19) . . ? 
B8 B9 B10 109.51(19) . . ? 
B5 B9 I1 121.42(17) . . ? 
B12 B9 I1 121.22(17) . . ? 
B4 B9 I1 120.53(16) . . ? 
B8 B9 I1 120.18(16) . . ? 
B10 B9 I1 121.94(17) . . ? 
B11 B10 B6 60.31(17) . . ? 
B11 B10 B5 107.8(2) . . ? 
B6 B10 B5 59.75(16) . . ? 
B11 B10 B9 106.6(2) . . ? 
B6 B10 B9 106.89(19) . . ? 
B5 B10 B9 59.67(15) . . ? 
B11 B10 B12 59.53(16) . . ? 
B6 B10 B12 107.7(2) . . ? 
B5 B10 B12 107.61(19) . . ? 
B9 B10 B12 59.34(14) . . ? 
C2 B11 B10 105.01(19) . . ? 
C2 B11 B12 104.30(19) . . ? 
B10 B11 B12 60.99(16) . . ? 
C2 B11 B6 59.06(15) . . ? 
B10 B11 B6 59.97(16) . . ? 
B12 B11 B6 108.62(19) . . ? 
C2 B11 B7 58.34(15) . . ? 
B10 B11 B7 108.86(19) . . ? 
B12 B11 B7 59.79(16) . . ? 
B6 B11 B7 108.38(19) . . ? 
B11 B12 B9 107.0(2) . . ? 
B11 B12 B7 60.53(16) . . ? 
B9 B12 B7 107.35(19) . . ? 
B11 B12 B8 107.75(19) . . ? 
B9 B12 B8 59.83(15) . . ? 
B7 B12 B8 59.59(15) . . ? 
B11 B12 B10 59.48(16) . . ? 
B9 B12 B10 59.90(15) . . ? 
B7 B12 B10 108.25(19) . . ? 
B8 B12 B10 108.09(19) . . ? 
 
_diffrn_measured_fraction_theta_max    0.999 
_diffrn_reflns_theta_full              25.25 
_diffrn_measured_fraction_theta_full   0.999 
_refine_diff_density_max    0.352 
_refine_diff_density_min   -0.261 
_refine_diff_density_rms    0.042 

#===END

data_8aj
 
_audit_creation_method            SHELXL-97 
_chemical_name_systematic 
; 
 ? 
; 
_chemical_name_common             ? 
_chemical_melting_point           ? 
_chemical_formula_moiety          ? 
_chemical_formula_sum 
 'C10 H24 B10 O2' 
_chemical_formula_weight          284.39 
 
loop_ 
 _atom_type_symbol 
 _atom_type_description 
 _atom_type_scat_dispersion_real 
 _atom_type_scat_dispersion_imag 
 _atom_type_scat_source 
 'C'  'C'   0.0033   0.0016 
 'International Tables Vol C Tables 4.2.6.8 and 6.1.1.4' 
 'H'  'H'   0.0000   0.0000 
 'International Tables Vol C Tables 4.2.6.8 and 6.1.1.4' 
 'B'  'B'   0.0013   0.0007 
 'International Tables Vol C Tables 4.2.6.8 and 6.1.1.4' 
 'O'  'O'   0.0106   0.0060 
 'International Tables Vol C Tables 4.2.6.8 and 6.1.1.4' 
 
_symmetry_cell_setting            Monoclinic 
_symmetry_space_group_name_H-M    C2/c 
 
loop_ 
 _symmetry_equiv_pos_as_xyz 
 'x, y, z' 
 '-x, y, -z+1/2' 
 'x+1/2, y+1/2, z' 
 '-x+1/2, y+1/2, -z+1/2' 
 '-x, -y, -z' 
 'x, -y, z-1/2' 
 '-x+1/2, -y+1/2, -z' 
 'x+1/2, -y+1/2, z-1/2' 
 
_cell_length_a                    28.0596(19) 
_cell_length_b                    7.3777(5) 
_cell_length_c                    17.1759(12) 
_cell_angle_alpha                 90.00 
_cell_angle_beta                  112.1270(10) 
_cell_angle_gamma                 90.00 
_cell_volume                      3293.8(4) 
_cell_formula_units_Z             8 
_cell_measurement_temperature     296(2) 
_cell_measurement_reflns_used     43 
_cell_measurement_theta_min       15 
_cell_measurement_theta_max       15 
 
_exptl_crystal_description        block 
_exptl_crystal_colour             colourless 
_exptl_crystal_size_max           0.50 
_exptl_crystal_size_mid           0.30 
_exptl_crystal_size_min           0.20 
_exptl_crystal_density_meas       ? 
_exptl_crystal_density_diffrn     1.147 
_exptl_crystal_density_method     'not measured' 
_exptl_crystal_F_000              1200 
_exptl_absorpt_coefficient_mu     0.063 
_exptl_absorpt_correction_type    multi-scan 
_exptl_absorpt_correction_T_min   0.6668  
_exptl_absorpt_correction_T_max   0.7456 
_exptl_absorpt_process_details    ? 
 
_exptl_special_details 
; 
 ? 
; 
 
_diffrn_ambient_temperature       296(2) 
_diffrn_radiation_wavelength      0.71073 
_diffrn_radiation_type            MoK\a 
_diffrn_radiation_source          'fine-focus sealed tube' 
_diffrn_radiation_monochromator   graphite 
_diffrn_measurement_device_type   'BRUKER KAPPA APEXII DUO DIFFRACTROMETER' 
_diffrn_measurement_method        'OMEGA SCAN' 
_diffrn_detector_area_resol_mean  ? 
_diffrn_reflns_number             12302 
_diffrn_reflns_av_R_equivalents   0.0438 
_diffrn_reflns_av_sigmaI/netI     0.0398 
_diffrn_reflns_limit_h_min        -31 
_diffrn_reflns_limit_h_max        33 
_diffrn_reflns_limit_k_min        -8 
_diffrn_reflns_limit_k_max        8 
_diffrn_reflns_limit_l_min        -20 
_diffrn_reflns_limit_l_max        20 
_diffrn_reflns_theta_min          1.57 
_diffrn_reflns_theta_max          25.25 
_reflns_number_total              2987 
_reflns_number_gt                 1715 
_reflns_threshold_expression      >2sigma(I) 
 
_computing_data_collection        'BRUKER KAPPA APEXII DUO DIFFRACTROMETER'  
_computing_cell_refinement        'BRUKER KAPPA APEXII DUO DIFFRACTROMETER'  
_computing_data_reduction         'BRUKER KAPPA APEXII DUO DIFFRACTROMETER'  
_computing_structure_solution     'SHELXS-97 (Sheldrick, 2008)' 
_computing_structure_refinement   'SHELXL-97 (Sheldrick, 2008)' 
_computing_molecular_graphics     'SIEMENS SHELXTL' 
_computing_publication_material   'SIEMENS SHELXTL'  
 
_refine_special_details 
; 
 Refinement of F^2^ against ALL reflections.  The weighted R-factor wR and 
 goodness of fit S are based on F^2^, conventional R-factors R are based 
 on F, with F set to zero for negative F^2^. The threshold expression of 
 F^2^ > 2sigma(F^2^) is used only for calculating R-factors(gt) etc. and is 
 not relevant to the choice of reflections for refinement.  R-factors based 
 on F^2^ are statistically about twice as large as those based on F, and R- 
 factors based on ALL data will be even larger. 
; 
 
_refine_ls_structure_factor_coef  Fsqd  
_refine_ls_matrix_type            full 
_refine_ls_weighting_scheme       calc  
_refine_ls_weighting_details 
 'calc w=1/[\s^2^(Fo^2^)+(0.1177P)^2^+5.0860P] where P=(Fo^2^+2Fc^2^)/3' 
_atom_sites_solution_primary      direct 
_atom_sites_solution_secondary    difmap 
_atom_sites_solution_hydrogens    geom 
_refine_ls_hydrogen_treatment     riding
_refine_ls_extinction_method      none 
_refine_ls_extinction_coef        ? 
_refine_ls_number_reflns          2987 
_refine_ls_number_parameters      199 
_refine_ls_number_restraints      10 
_refine_ls_R_factor_all           0.1300 
_refine_ls_R_factor_gt            0.0775 
_refine_ls_wR_factor_ref          0.2584 
_refine_ls_wR_factor_gt           0.2117 
_refine_ls_goodness_of_fit_ref    1.053 
_refine_ls_restrained_S_all       1.109 
_refine_ls_shift/su_max           0.000 
_refine_ls_shift/su_mean          0.000 
 
loop_ 
 _atom_site_label 
 _atom_site_type_symbol 
 _atom_site_fract_x 
 _atom_site_fract_y 
 _atom_site_fract_z 
 _atom_site_U_iso_or_equiv 
 _atom_site_adp_type 
 _atom_site_occupancy 
 _atom_site_symmetry_multiplicity 
 _atom_site_calc_flag 
 _atom_site_refinement_flags 
 _atom_site_disorder_assembly 
 _atom_site_disorder_group 
C1 C 0.15119(12) 0.9699(4) 0.02304(19) 0.0428(8) Uani 1 1 d . . . 
C2 C 0.10947(12) 0.8144(5) 0.0318(2) 0.0440(8) Uani 1 1 d . . . 
C11 C 0.18134(14) 1.0849(5) 0.1003(2) 0.0655(11) Uani 1 1 d D . . 
H11A H 0.1570 1.1357 0.1230 0.079 Uiso 1 1 calc R . . 
C12 C 0.21316(19) 1.2411(7) 0.0851(3) 0.1023(19) Uani 1 1 d D . . 
H12A H 0.2161 1.2284 0.0308 0.123 Uiso 1 1 calc R . . 
H12B H 0.1974 1.3572 0.0870 0.123 Uiso 1 1 calc R . . 
C13 C 0.26421(18) 1.2263(7) 0.1539(3) 0.0963(17) Uani 1 1 d D . . 
H13A H 0.2904 1.1993 0.1316 0.116 Uiso 1 1 calc R . . 
H13B H 0.2731 1.3390 0.1852 0.116 Uiso 1 1 calc R . . 
C14 C 0.26021(19) 1.0784(8) 0.2083(3) 0.112(2) Uani 1 1 d D . . 
H14A H 0.2908 1.0032 0.2252 0.135 Uiso 1 1 calc R . . 
H14B H 0.2568 1.1271 0.2584 0.135 Uiso 1 1 calc R . . 
C15 C 0.10763(14) 0.7852(6) 0.1193(2) 0.0646(11) Uani 1 1 d D . . 
H15A H 0.1331 0.8666 0.1584 0.078 Uiso 1 1 calc R . . 
C16 C 0.05684(17) 0.8216(7) 0.1278(3) 0.0817(14) Uani 1 1 d D . . 
H16A H 0.0598 0.9213 0.1662 0.098 Uiso 1 1 calc R . . 
H16B H 0.0303 0.8500 0.0737 0.098 Uiso 1 1 calc R . . 
C17 C 0.0454(3) 0.6510(9) 0.1614(7) 0.176(4) Uani 1 1 d D . . 
H17A H 0.0437 0.6723 0.2161 0.212 Uiso 1 1 calc R . . 
H17B H 0.0123 0.6045 0.1241 0.212 Uiso 1 1 calc R . . 
C18 C 0.0848(3) 0.5221(9) 0.1689(5) 0.136(3) Uani 1 1 d D . . 
H18A H 0.1001 0.4783 0.2263 0.163 Uiso 1 1 calc R . . 
H18B H 0.0705 0.4196 0.1322 0.163 Uiso 1 1 calc R . . 
O1 O 0.21669(11) 0.9758(4) 0.16215(17) 0.0908(11) Uani 1 1 d D . . 
O2 O 0.12236(11) 0.6086(5) 0.1462(2) 0.0953(12) Uani 1 1 d D . . 
B3 B 0.08624(14) 1.0132(6) -0.0207(2) 0.0495(10) Uani 1 1 d . . . 
H3 H 0.0671 1.1179 0.0027 0.059 Uiso 1 1 calc R . . 
B4 B 0.12748(17) 1.0679(6) -0.0739(3) 0.0565(11) Uani 1 1 d . . . 
H4 H 0.1349 1.2092 -0.0865 0.068 Uiso 1 1 calc R . . 
B5 B 0.17652(16) 0.8994(7) -0.0479(3) 0.0573(11) Uani 1 1 d . . . 
H5 H 0.2158 0.9303 -0.0437 0.069 Uiso 1 1 calc R . . 
B6 B 0.16499(15) 0.7429(6) 0.0213(3) 0.0522(11) Uani 1 1 d . . . 
H6 H 0.1966 0.6736 0.0712 0.063 Uiso 1 1 calc R . . 
B7 B 0.05653(16) 0.8034(7) -0.0602(3) 0.0600(12) Uani 1 1 d . . . 
H7 H 0.0174 0.7716 -0.0639 0.072 Uiso 1 1 calc R . . 
B8 B 0.06767(17) 0.9617(7) -0.1281(3) 0.0662(13) Uani 1 1 d . . . 
H8 H 0.0359 1.0336 -0.1767 0.079 Uiso 1 1 calc R . . 
B9 B 0.12333(19) 0.8914(8) -0.1450(3) 0.0716(14) Uani 1 1 d . . . 
H9 H 0.1279 0.9169 -0.2049 0.086 Uiso 1 1 calc R . . 
B10 B 0.1464(2) 0.6896(7) -0.0860(3) 0.0718(14) Uani 1 1 d . . . 
H10 H 0.1660 0.5829 -0.1073 0.086 Uiso 1 1 calc R . . 
B11 B 0.10503(19) 0.6371(7) -0.0338(3) 0.0654(13) Uani 1 1 d . . . 
H11 H 0.0976 0.4966 -0.0202 0.078 Uiso 1 1 calc R . . 
B12 B 0.0794(2) 0.7274(8) -0.1359(3) 0.0738(15) Uani 1 1 d . . . 
H12 H 0.0553 0.6455 -0.1900 0.089 Uiso 1 1 calc R . . 
 
loop_ 
 _atom_site_aniso_label 
 _atom_site_aniso_U_11 
 _atom_site_aniso_U_22 
 _atom_site_aniso_U_33 
 _atom_site_aniso_U_23 
 _atom_site_aniso_U_13 
 _atom_site_aniso_U_12 
C1 0.0393(17) 0.0429(19) 0.0423(17) 0.0029(14) 0.0109(13) 0.0010(14) 
C2 0.0384(17) 0.048(2) 0.0431(18) 0.0009(15) 0.0122(14) -0.0001(15) 
C11 0.055(2) 0.066(3) 0.061(2) -0.010(2) 0.0053(18) -0.009(2) 
C12 0.105(4) 0.072(3) 0.095(4) 0.009(3) -0.002(3) -0.036(3) 
C13 0.085(3) 0.105(4) 0.097(4) -0.010(3) 0.031(3) -0.034(3) 
C14 0.076(3) 0.140(5) 0.088(3) 0.012(4) -0.006(3) -0.048(3) 
C15 0.058(2) 0.080(3) 0.056(2) 0.007(2) 0.0214(19) -0.010(2) 
C16 0.073(3) 0.109(4) 0.075(3) 0.009(3) 0.042(2) 0.010(3) 
C17 0.146(6) 0.110(5) 0.349(13) 0.037(7) 0.179(8) 0.004(5) 
C18 0.156(6) 0.119(5) 0.178(6) 0.058(5) 0.114(5) 0.008(5) 
O1 0.079(2) 0.085(2) 0.0665(18) 0.0182(16) -0.0200(15) -0.0329(17) 
O2 0.072(2) 0.123(3) 0.097(2) 0.061(2) 0.0390(17) 0.0309(19) 
B3 0.041(2) 0.056(3) 0.047(2) 0.0054(19) 0.0102(17) 0.0130(18) 
B4 0.061(3) 0.058(3) 0.049(2) 0.015(2) 0.019(2) 0.008(2) 
B5 0.050(2) 0.068(3) 0.057(2) 0.008(2) 0.024(2) 0.007(2) 
B6 0.047(2) 0.046(2) 0.062(3) 0.007(2) 0.0199(19) 0.0090(19) 
B7 0.042(2) 0.081(3) 0.047(2) -0.014(2) 0.0059(18) -0.006(2) 
B8 0.054(2) 0.093(4) 0.042(2) 0.007(2) 0.0064(18) 0.012(2) 
B9 0.074(3) 0.097(4) 0.046(2) -0.002(3) 0.025(2) 0.008(3) 
B10 0.080(3) 0.067(3) 0.076(3) -0.017(3) 0.037(3) 0.010(3) 
B11 0.073(3) 0.050(3) 0.074(3) -0.012(2) 0.029(2) -0.009(2) 
B12 0.071(3) 0.089(4) 0.056(3) -0.027(3) 0.018(2) -0.012(3) 
 
_geom_special_details 
; 
 All esds (except the esd in the dihedral angle between two l.s. planes) 
 are estimated using the full covariance matrix.  The cell esds are taken 
 into account individually in the estimation of esds in distances, angles 
 and torsion angles; correlations between esds in cell parameters are only 
 used when they are defined by crystal symmetry.  An approximate (isotropic) 
 treatment of cell esds is used for estimating esds involving l.s. planes. 
; 
 
loop_ 
 _geom_bond_atom_site_label_1 
 _geom_bond_atom_site_label_2 
 _geom_bond_distance 
 _geom_bond_site_symmetry_2 
 _geom_bond_publ_flag 
C1 C11 1.533(5) . ? 
C1 C2 1.686(5) . ? 
C1 B4 1.704(5) . ? 
C1 B5 1.708(5) . ? 
C1 B3 1.719(5) . ? 
C1 B6 1.722(5) . ? 
C2 C15 1.539(5) . ? 
C2 B11 1.701(6) . ? 
C2 B7 1.715(5) . ? 
C2 B3 1.716(5) . ? 
C2 B6 1.718(5) . ? 
C11 O1 1.402(4) . ? 
C11 C12 1.540(5) . ? 
C12 C13 1.478(6) . ? 
C13 C14 1.468(6) . ? 
C14 O1 1.401(4) . ? 
C15 O2 1.392(5) . ? 
C15 C16 1.510(5) . ? 
C16 C17 1.470(6) . ? 
C17 C18 1.429(6) . ? 
C18 O2 1.406(5) . ? 
B3 B8 1.760(6) . ? 
B3 B7 1.768(6) . ? 
B3 B4 1.771(6) . ? 
B4 B9 1.758(7) . ? 
B4 B8 1.766(7) . ? 
B4 B5 1.782(6) . ? 
B5 B10 1.766(7) . ? 
B5 B9 1.771(6) . ? 
B5 B6 1.772(6) . ? 
B6 B10 1.759(7) . ? 
B6 B11 1.771(6) . ? 
B7 B12 1.746(7) . ? 
B7 B11 1.760(7) . ? 
B7 B8 1.760(7) . ? 
B8 B9 1.770(7) . ? 
B8 B12 1.775(8) . ? 
B9 B12 1.775(8) . ? 
B9 B10 1.780(7) . ? 
B10 B11 1.755(7) . ? 
B10 B12 1.769(7) . ? 
B11 B12 1.756(7) . ? 
 
loop_ 
 _geom_angle_atom_site_label_1 
 _geom_angle_atom_site_label_2 
 _geom_angle_atom_site_label_3 
 _geom_angle 
 _geom_angle_site_symmetry_1 
 _geom_angle_site_symmetry_3 
 _geom_angle_publ_flag 
C11 C1 C2 118.4(3) . . ? 
C11 C1 B4 119.7(3) . . ? 
C2 C1 B4 110.3(3) . . ? 
C11 C1 B5 123.0(3) . . ? 
C2 C1 B5 110.2(3) . . ? 
B4 C1 B5 63.0(2) . . ? 
C11 C1 B3 115.1(3) . . ? 
C2 C1 B3 60.5(2) . . ? 
B4 C1 B3 62.3(2) . . ? 
B5 C1 B3 113.8(3) . . ? 
C11 C1 B6 119.9(3) . . ? 
C2 C1 B6 60.5(2) . . ? 
B4 C1 B6 113.7(3) . . ? 
B5 C1 B6 62.2(2) . . ? 
B3 C1 B6 112.4(3) . . ? 
C15 C2 C1 117.5(3) . . ? 
C15 C2 B11 121.3(3) . . ? 
C1 C2 B11 110.1(3) . . ? 
C15 C2 B7 123.9(3) . . ? 
C1 C2 B7 109.9(3) . . ? 
B11 C2 B7 62.0(3) . . ? 
C15 C2 B3 119.1(3) . . ? 
C1 C2 B3 60.7(2) . . ? 
B11 C2 B3 113.0(3) . . ? 
B7 C2 B3 62.0(2) . . ? 
C15 C2 B6 115.2(3) . . ? 
C1 C2 B6 60.8(2) . . ? 
B11 C2 B6 62.4(2) . . ? 
B7 C2 B6 113.2(3) . . ? 
B3 C2 B6 112.8(3) . . ? 
O1 C11 C1 109.9(3) . . ? 
O1 C11 C12 105.6(3) . . ? 
C1 C11 C12 115.7(4) . . ? 
C13 C12 C11 105.0(4) . . ? 
C14 C13 C12 106.3(4) . . ? 
O1 C14 C13 107.5(4) . . ? 
O2 C15 C16 107.9(3) . . ? 
O2 C15 C2 109.8(3) . . ? 
C16 C15 C2 116.7(3) . . ? 
C17 C16 C15 103.9(4) . . ? 
C18 C17 C16 109.1(5) . . ? 
O2 C18 C17 108.0(5) . . ? 
C14 O1 C11 109.6(3) . . ? 
C15 O2 C18 110.9(4) . . ? 
C2 B3 C1 58.77(19) . . ? 
C2 B3 B8 105.7(3) . . ? 
C1 B3 B8 105.3(3) . . ? 
C2 B3 B7 59.0(2) . . ? 
C1 B3 B7 105.9(3) . . ? 
B8 B3 B7 59.9(3) . . ? 
C2 B3 B4 105.8(3) . . ? 
C1 B3 B4 58.4(2) . . ? 
B8 B3 B4 60.0(3) . . ? 
B7 B3 B4 107.9(3) . . ? 
C1 B4 B9 105.3(3) . . ? 
C1 B4 B8 105.7(3) . . ? 
B9 B4 B8 60.3(3) . . ? 
C1 B4 B3 59.3(2) . . ? 
B9 B4 B3 107.7(3) . . ? 
B8 B4 B3 59.7(2) . . ? 
C1 B4 B5 58.6(2) . . ? 
B9 B4 B5 60.0(3) . . ? 
B8 B4 B5 108.3(3) . . ? 
B3 B4 B5 107.7(3) . . ? 
C1 B5 B10 105.1(3) . . ? 
C1 B5 B9 104.6(3) . . ? 
B10 B5 B9 60.4(3) . . ? 
C1 B5 B6 59.3(2) . . ? 
B10 B5 B6 59.6(3) . . ? 
B9 B5 B6 107.9(3) . . ? 
C1 B5 B4 58.4(2) . . ? 
B10 B5 B4 107.5(3) . . ? 
B9 B5 B4 59.3(3) . . ? 
B6 B5 B4 107.7(3) . . ? 
C2 B6 C1 58.7(2) . . ? 
C2 B6 B10 104.8(3) . . ? 
C1 B6 B10 104.8(3) . . ? 
C2 B6 B11 58.3(2) . . ? 
C1 B6 B11 105.3(3) . . ? 
B10 B6 B11 59.6(3) . . ? 
C2 B6 B5 105.8(3) . . ? 
C1 B6 B5 58.5(2) . . ? 
B10 B6 B5 60.0(3) . . ? 
B11 B6 B5 107.8(3) . . ? 
C2 B7 B12 105.5(3) . . ? 
C2 B7 B11 58.6(2) . . ? 
B12 B7 B11 60.1(3) . . ? 
C2 B7 B8 105.7(3) . . ? 
B12 B7 B8 60.8(3) . . ? 
B11 B7 B8 108.6(3) . . ? 
C2 B7 B3 59.0(2) . . ? 
B12 B7 B3 108.3(3) . . ? 
B11 B7 B3 107.7(3) . . ? 
B8 B7 B3 59.8(3) . . ? 
B3 B8 B7 60.3(2) . . ? 
B3 B8 B4 60.3(2) . . ? 
B7 B8 B4 108.4(3) . . ? 
B3 B8 B9 107.7(3) . . ? 
B7 B8 B9 107.6(3) . . ? 
B4 B8 B9 59.6(3) . . ? 
B3 B8 B12 107.4(3) . . ? 
B7 B8 B12 59.2(3) . . ? 
B4 B8 B12 107.8(3) . . ? 
B9 B8 B12 60.1(3) . . ? 
B4 B9 B8 60.1(3) . . ? 
B4 B9 B5 60.7(3) . . ? 
B8 B9 B5 108.6(3) . . ? 
B4 B9 B12 108.1(3) . . ? 
B8 B9 B12 60.1(3) . . ? 
B5 B9 B12 107.9(3) . . ? 
B4 B9 B10 108.0(3) . . ? 
B8 B9 B10 107.8(4) . . ? 
B5 B9 B10 59.7(3) . . ? 
B12 B9 B10 59.7(3) . . ? 
B11 B10 B6 60.5(3) . . ? 
B11 B10 B5 108.7(3) . . ? 
B6 B10 B5 60.4(3) . . ? 
B11 B10 B12 59.8(3) . . ? 
B6 B10 B12 108.3(3) . . ? 
B5 B10 B12 108.3(3) . . ? 
B11 B10 B9 107.9(3) . . ? 
B6 B10 B9 108.1(3) . . ? 
B5 B10 B9 59.9(3) . . ? 
B12 B10 B9 60.0(3) . . ? 
C2 B11 B10 105.7(3) . . ? 
C2 B11 B12 105.7(3) . . ? 
B10 B11 B12 60.5(3) . . ? 
C2 B11 B7 59.4(2) . . ? 
B10 B11 B7 108.1(4) . . ? 
B12 B11 B7 59.5(3) . . ? 
C2 B11 B6 59.3(2) . . ? 
B10 B11 B6 59.8(3) . . ? 
B12 B11 B6 108.4(3) . . ? 
B7 B11 B6 108.5(3) . . ? 
B7 B12 B11 60.3(3) . . ? 
B7 B12 B10 108.1(3) . . ? 
B11 B12 B10 59.7(3) . . ? 
B7 B12 B8 60.0(3) . . ? 
B11 B12 B8 108.2(3) . . ? 
B10 B12 B8 108.1(3) . . ? 
B7 B12 B9 108.0(4) . . ? 
B11 B12 B9 108.0(3) . . ? 
B10 B12 B9 60.3(3) . . ? 
B8 B12 B9 59.8(3) . . ? 
 
_diffrn_measured_fraction_theta_max    1.000 
_diffrn_reflns_theta_full              25.25 
_diffrn_measured_fraction_theta_full   1.000 
_refine_diff_density_max    0.376 
_refine_diff_density_min   -0.225 
_refine_diff_density_rms    0.048 

#===END
